# Supplementary material for: Traumatic brain injury and Alzheimer’s Disease biomarkers: A systematic review of findings from amyloid and tau positron emission tomography (PET)
Source: bioRxiv or medRxiv preprint supplement (doi:10.1101/2023.11.30.23298528), 2023-12-01
Supplement: Supplementary file [file media-1.pdf]

Cochrane Database Search Terms:

Search Name: PET and Alzheimer's

Date Run: 09/01/2023 16:00:32

Comment:

| ID  | Search                                | Hits  |
|-----|---------------------------------------|-------|
| #1  | [mh "positron emission tomography"]   | 1164  |
| #2  | Positron-Emission-Tomography          | 5330  |
| #3  | PET                                   | 8554  |
| #4  | Tau-positron-emission-tomography      | 6     |
| #5  | tau-PET                               | 56    |
| #6  | Florbetaben OR Neuraceq               | 37    |
| #7  | Flortaucipir OR Tauvid                | 23    |
| #8  | Flutemetamol                          | 33    |
| #9  | {OR #1-#8}                            | 9867  |
| #10 | Microtubule-associated-protein-tau    | 18    |
| #11 | [mh "tau Proteins"]                   | 94    |
| #12 | [mh "Amyloid beta-Protein Precursor"] | 248   |
| #13 | amyloid                               | 2869  |
| #14 | tau-protein*                          | 269   |
| #15 | protein-tau*                          | 34    |
| #16 | tau                                   | 6569  |
| #17 | MAPT                                  | 149   |
| #18 | tauopath*                             | 65    |
| #19 | [mh "Tauopathies"]                    | 3975  |
| #20 | [mh "Alzheimer Disease"]              | 3874  |
| #21 | alzheimer*                            | 14468 |
| #22 | {OR #10-#21}                          | 21753 |
| #23 | [mh "brain injuries"]                 | 2795  |

|     |                    |       |
|-----|--------------------|-------|
| #24 | brain-injur*       | 7993  |
| #25 | head-injur*        | 1979  |
| #26 | concussion*        | 1080  |
| #27 | neurotrauma*       | 456   |
| #28 | TBI                | 3323  |
| #29 | {OR #23-#28}       | 10563 |
| #30 | #9 and #22 and #29 | 21    |

Embase <1974 to 2023 January 06>

|    |                                        |        |
|----|----------------------------------------|--------|
| 1  | exp positron emission tomography/      | 214359 |
| 2  | Positron-Emission-Tomography.mp.       | 227720 |
| 3  | PET.mp.                                | 222819 |
| 4  | Tau-positron-emission-tomography.mp.   | 245    |
| 5  | tau-PET.mp.                            | 1433   |
| 6  | (Florbetaben or Neuraceq).mp.          | 1278   |
| 7  | (Flortaucipir or Tauvid).mp.           | 1488   |
| 8  | Flutemetamol.mp.                       | 977    |
| 9  | 1 or 2 or 3 or 4 or 5 or 6 or 7 or 8   | 312849 |
| 10 | Microtubule-associated-protein-tau.mp. | 2974   |
| 11 | exp tau protein/                       | 35702  |
| 12 | exp amyloid precursor protein/         | 20721  |
| 13 | exp amyloid beta protein/              | 53318  |
| 14 | exp "amyloid beta protein[1-40]"/      | 6966   |
| 15 | exp amyloid protein/                   | 5521   |
| 16 | exp amyloid beta protein antibody/     | 928    |
| 17 | exp "amyloid beta protein[25-35]"/     | 1894   |
| 18 | exp "amyloid beta protein[1-42]"/      | 16866  |
| 19 | amyloid.mp.                            | 158997 |
| 20 | tau-protein*.mp.                       | 37872  |
| 21 | protein-tau*.mp.                       | 4200   |
| 22 | tau.mp.                                | 78529  |
| 23 | MAPT.mp.                               | 3768   |
| 24 | tauopath*.mp.                          | 9606   |
| 25 | exp tauopathy/                         | 7168   |
| 26 | exp Alzheimer Disease/                 | 236017 |
| 27 | alzheimer*.mp.                         | 290465 |

|       |                                                                                                    |        |
|-------|----------------------------------------------------------------------------------------------------|--------|
| 28    | 10 or 11 or 12 or 13 or 14 or 15 or 16 or 17 or 18 or 19 or 20 or 21 or 22 or 23 or 24 or 25 or 26 |        |
| or 27 | 395884                                                                                             |        |
| 29    | exp brain injury/                                                                                  | 205692 |
| 30    | brain-injur*.mp.                                                                                   | 182866 |
| 31    | head-injur*.mp.                                                                                    | 62960  |
| 32    | concussion*.mp.                                                                                    | 19590  |
| 33    | neurotrauma*.mp.                                                                                   | 4243   |
| 34    | TBI.mp.                                                                                            | 50163  |
| 35    | 29 or 30 or 31 or 32 or 33 or 34                                                                   | 290877 |
| 36    | 9 and 28 and 35                                                                                    | 803    |

Ovid MEDLINE(R) ALL <1946 to January 06, 2023>

|    |                                                                      |        |
|----|----------------------------------------------------------------------|--------|
| 1  | exp Positron-Emission Tomography/                                    | 76608  |
| 2  | Positron-Emission-Tomography.mp.                                     | 112687 |
| 3  | PET.mp.                                                              | 123875 |
| 4  | Tau-positron-emission-tomography.mp.                                 | 194    |
| 5  | tau-PET.mp.                                                          | 674    |
| 6  | (Florbetaben or Neuraceq).mp.                                        | 385    |
| 7  | (Flortaucipir or Tauvid).mp.                                         | 319    |
| 8  | Flutemetamol.mp.                                                     | 296    |
| 9  | 1 or 2 or 3 or 4 or 5 or 6 or 7 or 8                                 | 157080 |
| 10 | Microtubule-associated-protein-tau.mp.                               | 2287   |
| 11 | exp tau Proteins/                                                    | 18048  |
| 12 | exp Amyloid beta-Protein Precursor/                                  | 46667  |
| 13 | amyloid.mp.                                                          | 114133 |
| 14 | tau-protein*.mp.                                                     | 21268  |
| 15 | protein-tau*.mp.                                                     | 3188   |
| 16 | tau.mp.                                                              | 55395  |
| 17 | MAPT.mp.                                                             | 4646   |
| 18 | tauopath*.mp.                                                        | 5545   |
| 19 | exp Tauopathies/                                                     | 118509 |
| 20 | exp Alzheimer Disease/                                               | 114419 |
| 21 | alzheimer*.mp.                                                       | 193967 |
| 22 | 10 or 11 or 12 or 13 or 14 or 15 or 16 or 17 or 18 or 19 or 20 or 21 | 278586 |
| 23 | exp Brain Injuries/                                                  | 80268  |
| 24 | brain-injur*.mp.                                                     | 108612 |
| 25 | head-injur*.mp.                                                      | 29387  |
| 26 | concussion*.mp.                                                      | 16303  |
| 27 | neurotrauma*.mp.                                                     | 2615   |

28 Tbl.mp. 30310  
29 23 or 24 or 25 or 26 or 27 or 28 143599  
30 9 and 22 and 29 172
